# Supplementary material for: Differential Globalization of Industry- and Non-Industry–Sponsored Clinical Trials
Source: PLOS journal article supplement (doi:10.1371/journal.pone.0145122), 2015-12-14

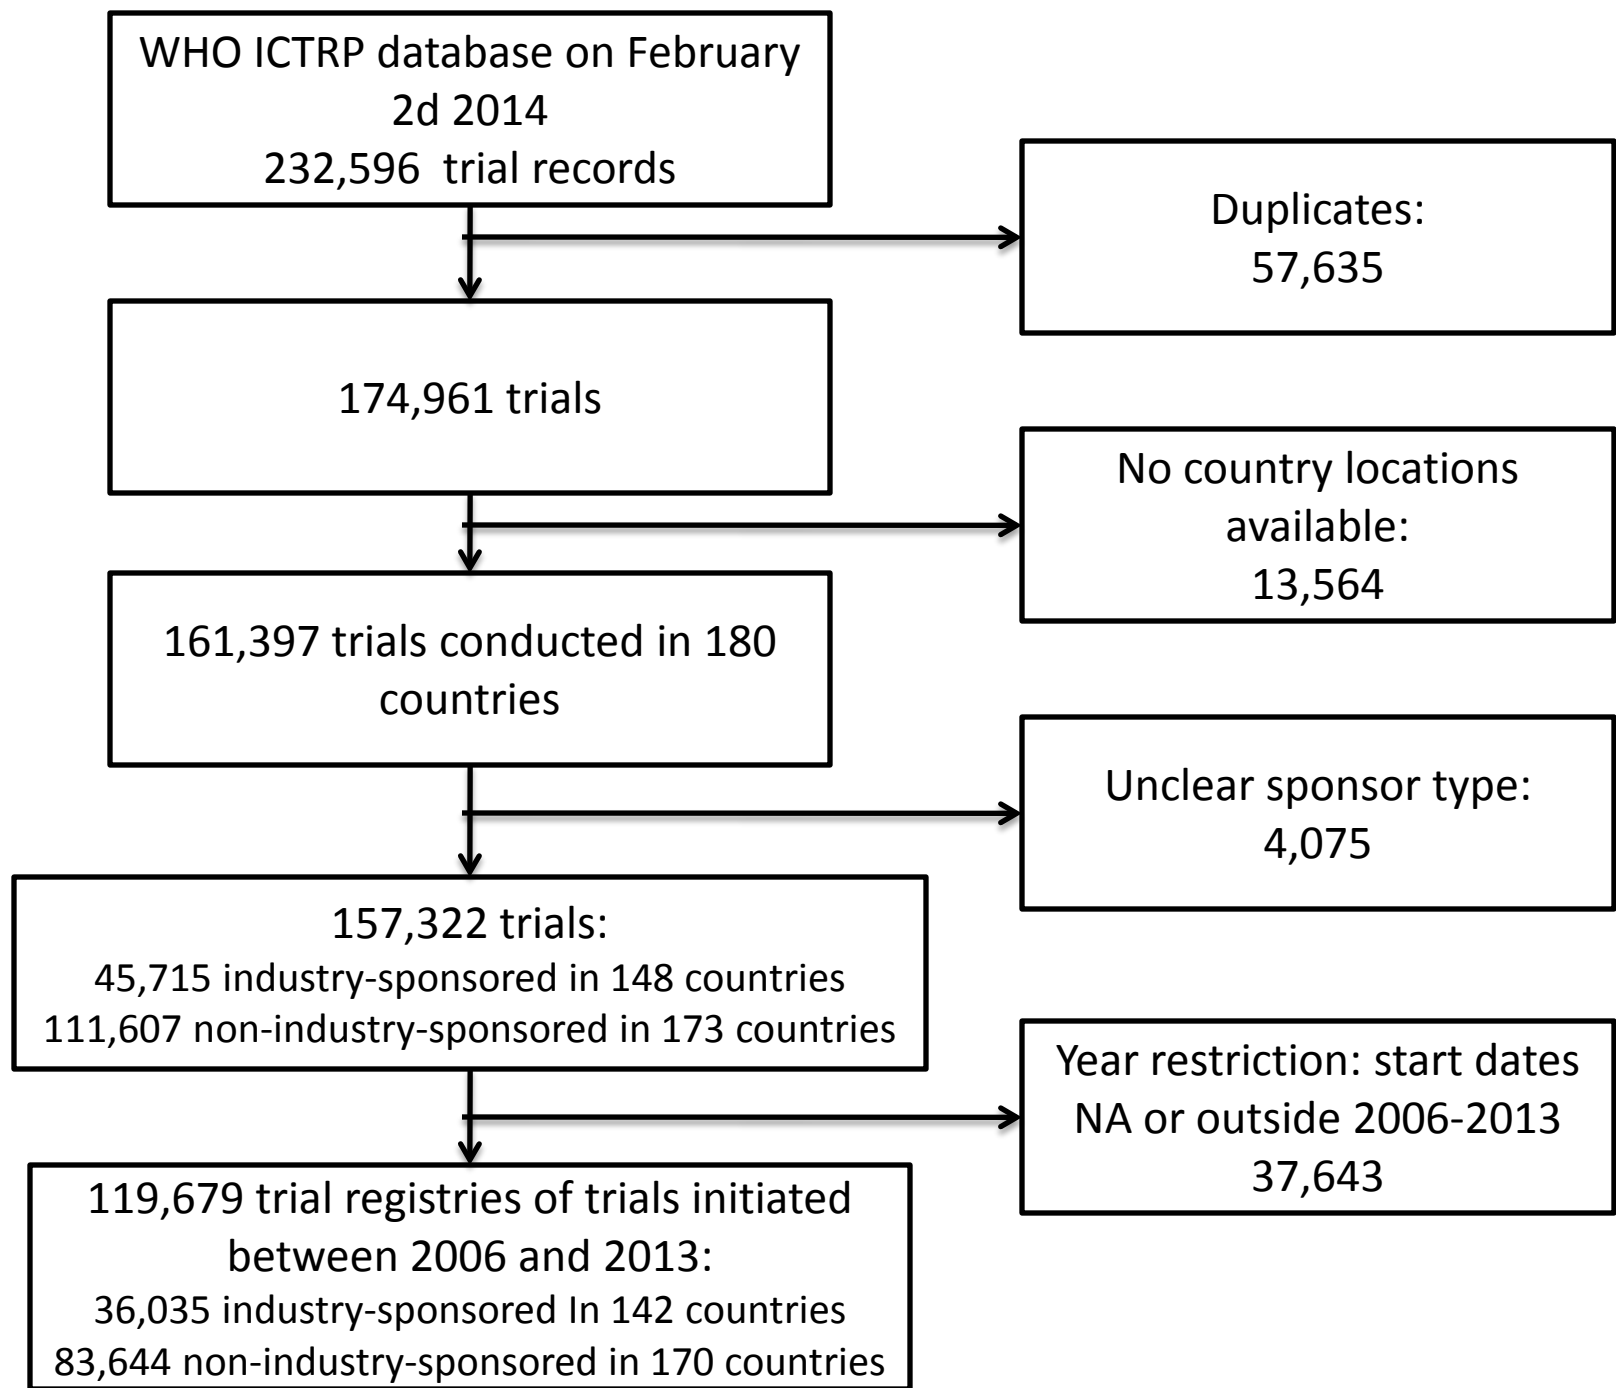

Supplement: S3 (10.1371/journal.pone.0145122.s003) [file journal.pone.0145122.s003]
